# Supplementary material for: Molecular Dynamics and Nuclear Magnetic Resonance Studies of Supercritical CO2 Sorption in Poly(Methyl Methacrylate)
Source: MDPI journal article supplement (doi:10.3390/polym14235332), 2022-12-06
Supplement: s1 [file s1]

Supplementary Materials

# Molecular Dynamics and Nuclear Magnetic Resonance Studies of Supercritical CO<sub>2</sub> Sorption in Poly(Methyl Methacrylate)

Valentina V. Sobornova, Konstantin V. Belov, Alexey A. Dyshin, Darya L. Gurina, Ilya A. Khodov\* and Michael G. Kiselev

G.A. Krestov Institute of Solution Chemistry, Russian Academy of Sciences, 153045 Ivanovo, Russia

\* Correspondence: iakh@isc-ras.ru

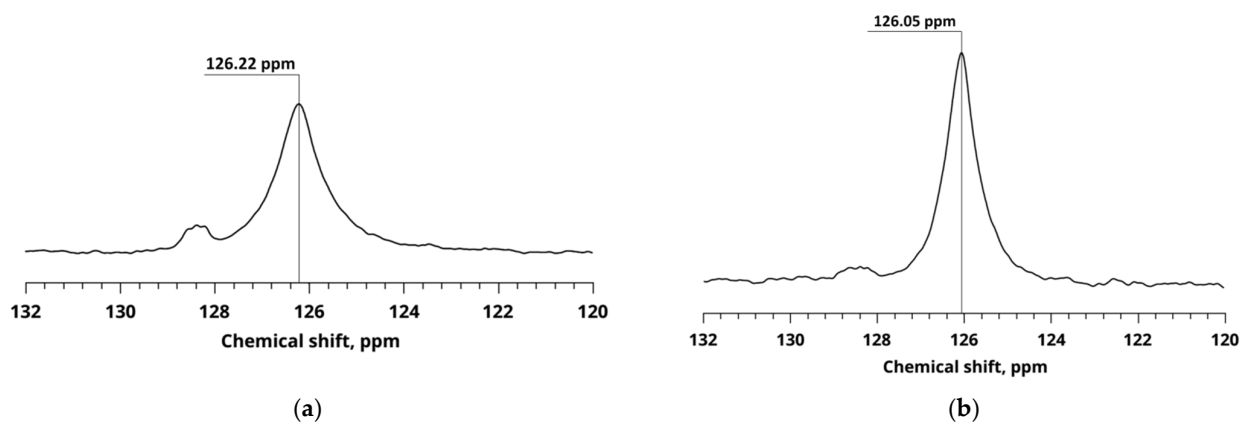

**Figure S1.** The <sup>13</sup>C NMR spectra initial time (a) and after completed (b) sorption process of CO<sub>2</sub> into the PMMA.
